# Supplementary material for: Distinct roles of short and long thymic stromal lymphopoietin isoforms in house dust mite-induced asthmatic airway epithelial barrier disruption
Source: PubMed Central journal article supplement (PMC5171874; doi:10.1038/srep39559), 2016-12-20
Supplement: srep39559-s1.pdf [file srep39559-s1.pdf]

**Distinct roles of short and long thymic stromal lymphopoietin isoforms in house dust mite-induced asthmatic airway epithelial barrier disruption.**

Hangming Dong<sup>1†</sup>; Yahui Hu<sup>1†</sup>; Laiyu Liu<sup>1†</sup>; Mengchen Zou<sup>1</sup>; Chaowen Huang<sup>1</sup>; Lishan Luo<sup>1</sup>; Changhui Yu<sup>2</sup>; Xuan Wan<sup>1</sup>; Haijin Zhao<sup>1</sup>; Jialong Chen<sup>2</sup>; Zhefan Xie<sup>1</sup>; Yanqing Le<sup>1</sup>; Fei Zou<sup>2\*\*</sup>; Shaoxi Cai<sup>1\*</sup>

**Figure 1**

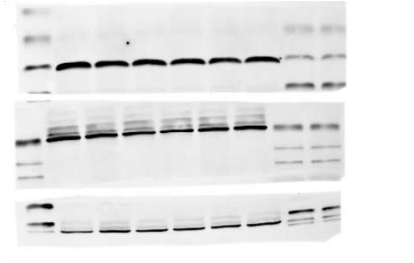

β-actin β-catenin E-cadherin Figure 1 a

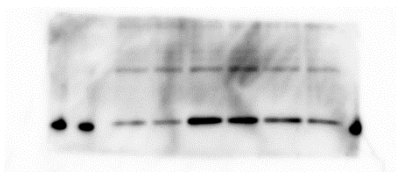

IFTSLP Figure 1 b

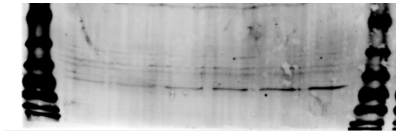

Secreted IFTSLP Figure 1 b

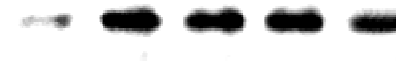

IFTSLP Figure 1 c

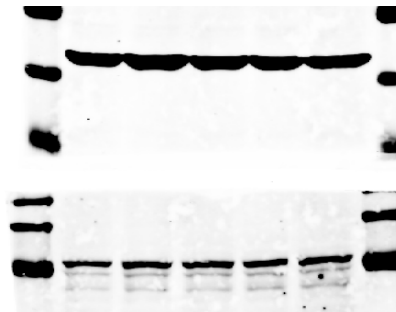

β-actin E-cadherin Figure 1 c

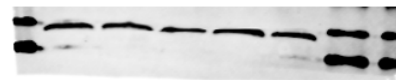

β-catenin Figure 1 c

**Figure 2**

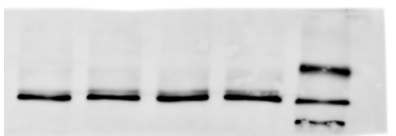

E-cadherin Figure 2 b

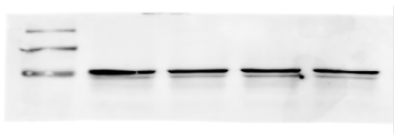

β-catenin Figure 2 b

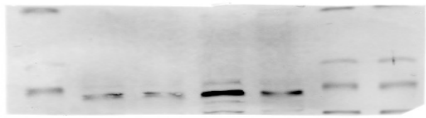

IftSLP Figure 2 b

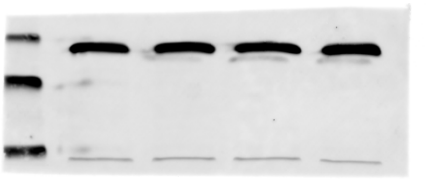

$\beta$ -actin Figure 2 b

### Figure 3

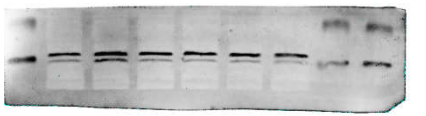

p-ERK Figure 3 a

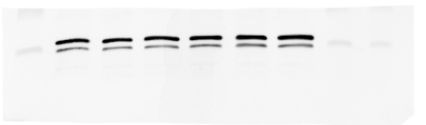

t-ERK Figure 3 a

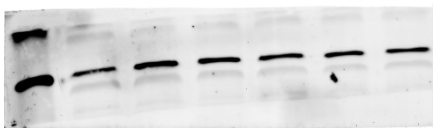

p-p38 Figure 3 a

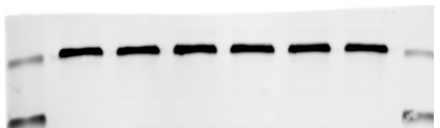

t-p38 Figure 3 a

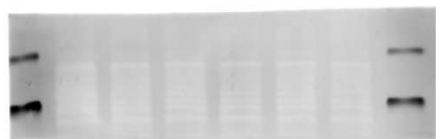

p-JNK Figure 3 a

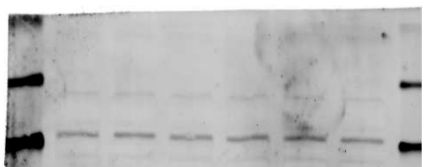

t-JNK Figure 3 a

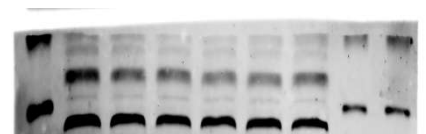

$\beta$ -actin Figure 3 a

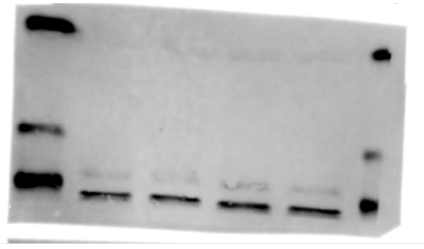

IFTSLP Figure 3 c

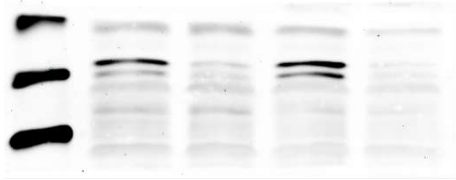

p-ERK Figure 3 c

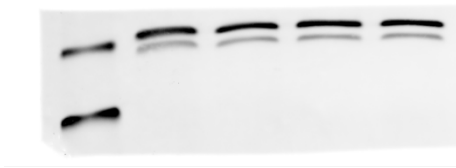

t-ERK Figure 3 c

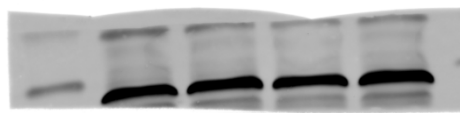

$\beta$ -actin Figure 3 c

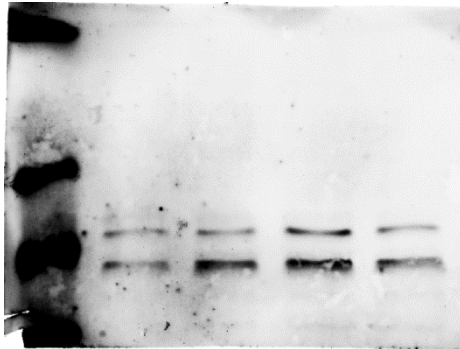

IFTSLP Figure 3 d

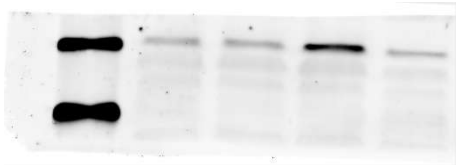

p-p38 Figure 3 d

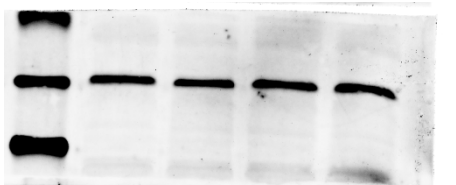

t-p38 Figure 3 d

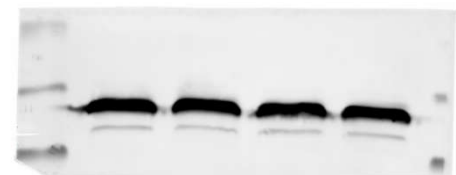

$\beta$ -actin Figure 3 d

**Figure 4**

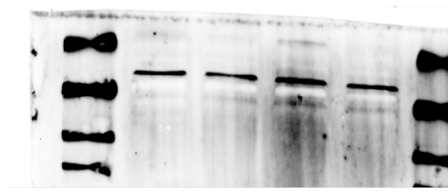

p-STAT5 Figure 4 a

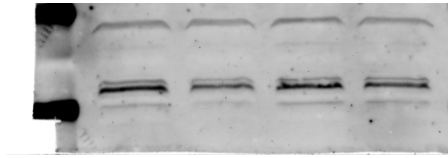

t-STAT5 Figure 4 a

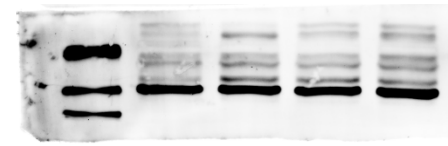

E-cadherin Figure 4 a

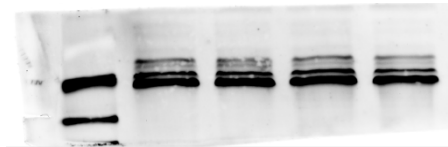

$\beta$ -catenin Figure 4 a

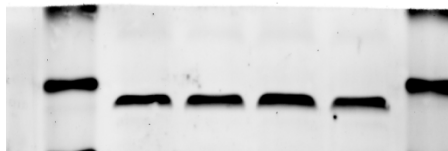

$\beta$ -actin Figure 4 a

**Figure 5**

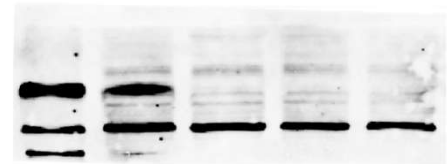

E-cadherin Figure 5 a

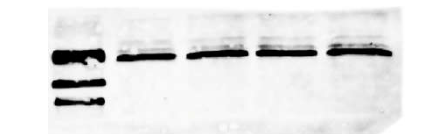

$\beta$ -catenin Figure 5 a

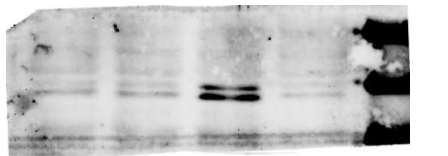

p-ERK Figure 5 a

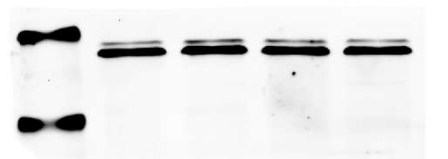

t-ERK Figure 5 a

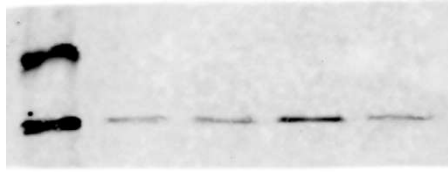

p-p38 Figure 5 a

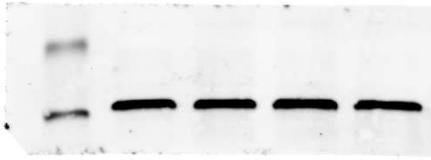

t-p38 Figure 5 a

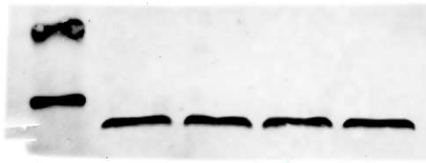

$\beta$ -actin Figure 5 a

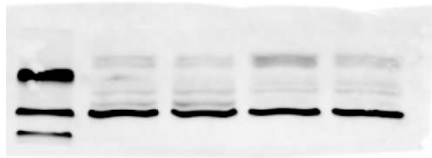

E-cadherin Figure 5 b

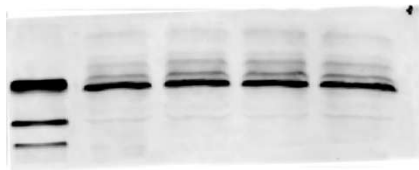

$\beta$ -catenin Figure 5 b

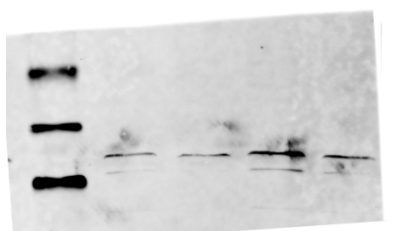

p-STAT5 Figure 5 b

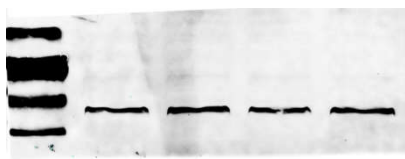

t-STAT5 Figure 5 b

## Figure 8

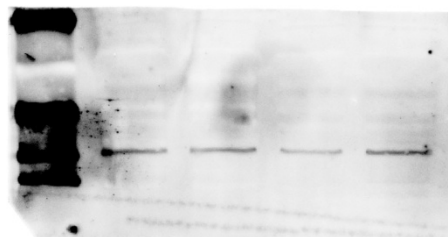

E-cadherin Figure 8 a

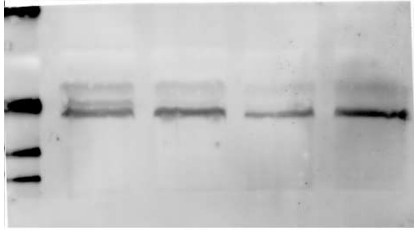

$\beta$ -catenin Figure 8 a

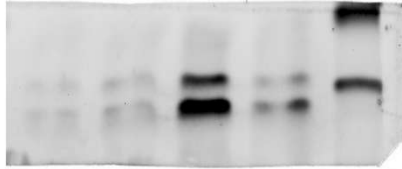

p-ERK Figure 8 a

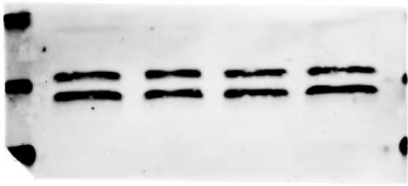

t-ERK Figure 8 a

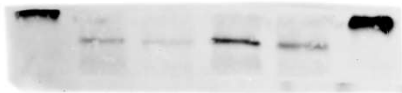

p-p38 Figure 8 a

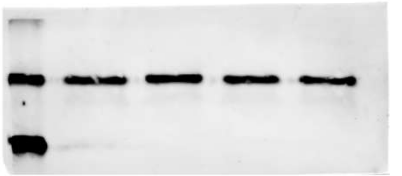

t-p38 Figure 8 a

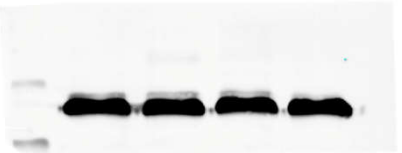

$\beta$ -actin Figure 8 a

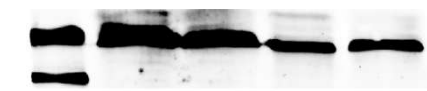

E-cadherin Figure 8 b

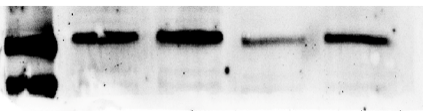

$\beta$ -catenin Figure 8 b

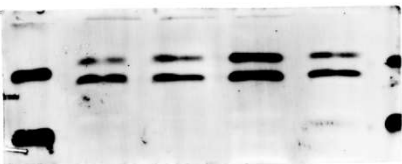

p-ERK Figure 8 b

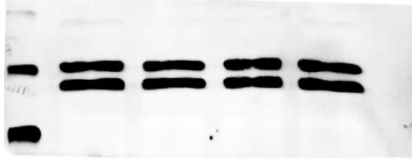

t-ERK Figure 8 b

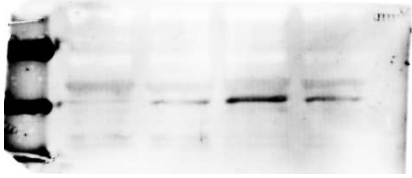

p-p38 Figure 8 b

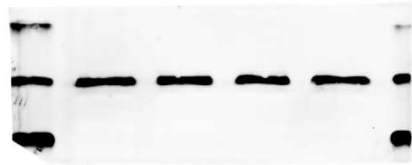

t-p38 Figure 8 b

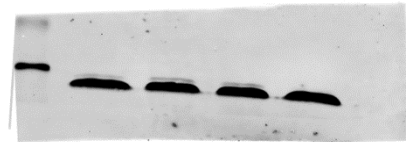

$\beta$ -actin Figure 8 b
